# Supplementary material for: Identification of Huge Phages from Wastewater Metagenomes
Source: MDPI journal article supplement (doi:10.3390/v15122330), 2023-11-28
Supplement: s1 [file s1]

Supplementary Materials:

## Identification of huge phages from wastewater metagenomes

René Kallies <sup>1\*</sup>, Die Hu <sup>1</sup>, Nafi'u Abdulkadir <sup>1</sup>, Michael Schlöter<sup>2</sup> and Ulisses Nunes da Rocha <sup>1\*</sup>

<sup>1</sup> Department for Environmental Microbiology, Helmholtz Centre for Environmental Research, Permoserstr. 15, D-04318 Leipzig, Germany; emails: die.hu@ufz.de; nafi.abdulkadir@ufz.de

<sup>2</sup> Department of Environmental Health, Helmholtz Munich, Ingolstaedter Landstr. 1 D-85758 Neuherberg, Germany email: schloter@helmholtz-muenchen.de

\* Correspondence: ulisses.rocha@ufz.de; rene.kallies@ufz.de

## Table of Contents

|                                                                       |   |
|-----------------------------------------------------------------------|---|
| Figure S1: Viral contig quality .....                                 | 2 |
| Figure S2: Viral contig size distribution.....                        | 3 |
| Figure S3: Functional annotation categories.....                      | 4 |
| Figure S4: TblastX genome-wide comparisons .....                      | 5 |
| Figure S5: Proteomic subtree of studied phages genomes .....          | 6 |
| Table S2. Overview of identified Auxiliary Metabolic Genes.....       | 7 |
| Table S3. Number of transfer RNAs per tRNA type and phage genome..... | 8 |

**Figure S1: Viral contig quality**

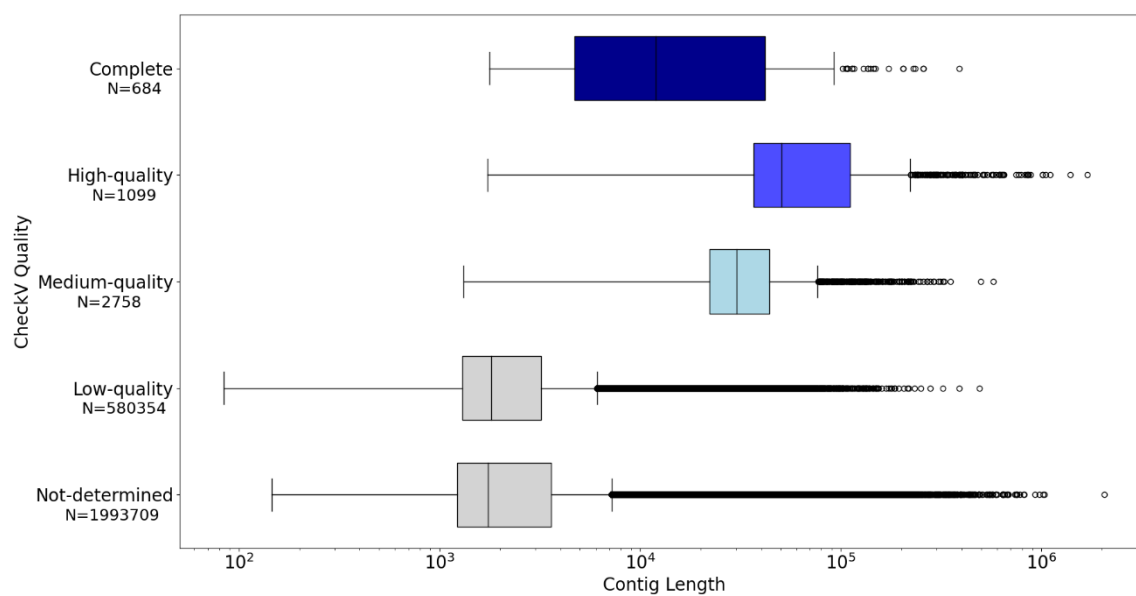

**Figure S1.** Boxplot presenting the number of metagenome recovered putative viral contigs and their CheckV based quality prediction. Complete (blue) and High-quality viral contigs were used for further analysis.

**Figure S2: Viral contig size distribution**

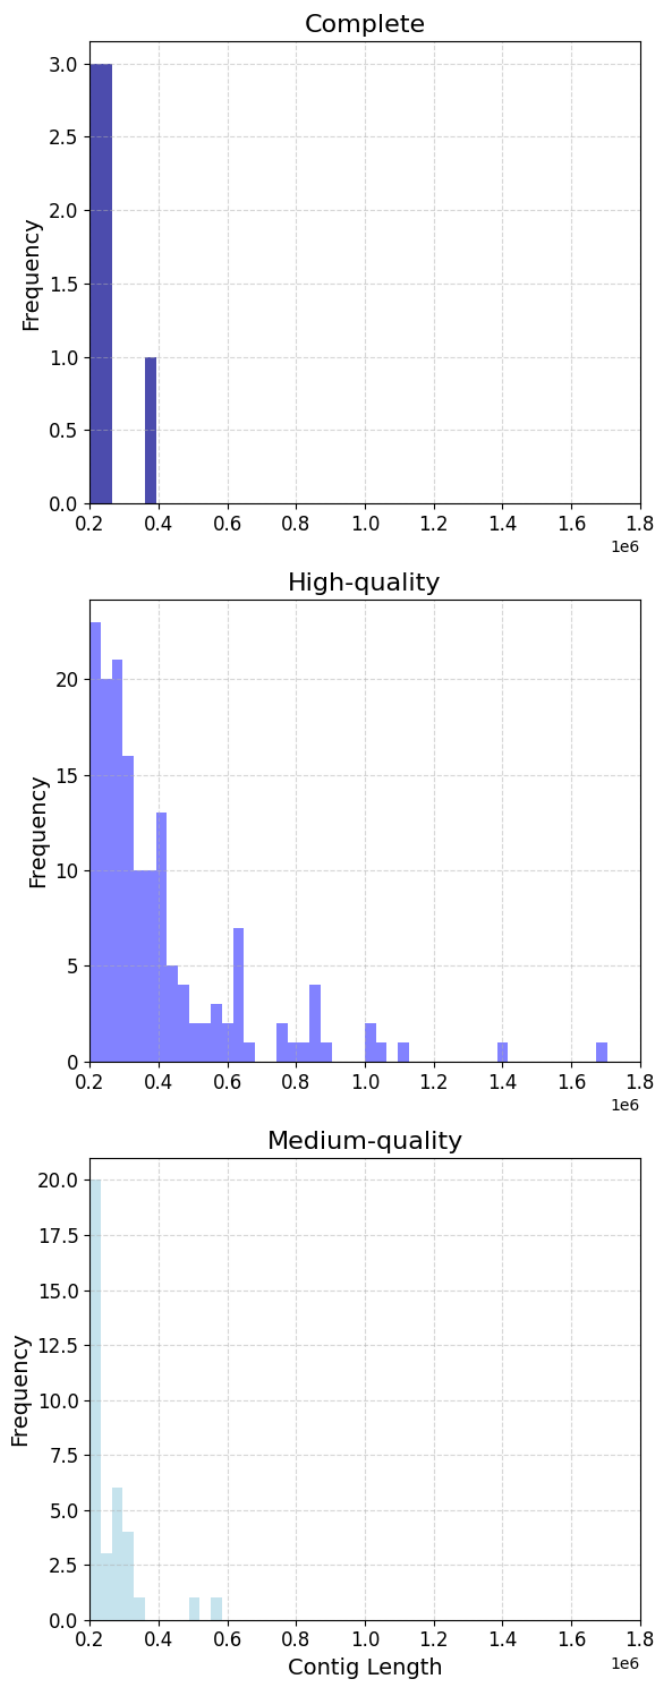

**Figure S2.** Size distribution for putative viral contigs with a minimum length of 200 kbases (huge phages) shown for CheckV 'Complete' and 'High-quality' categories.

**Figure S3: Functional annotation categories**

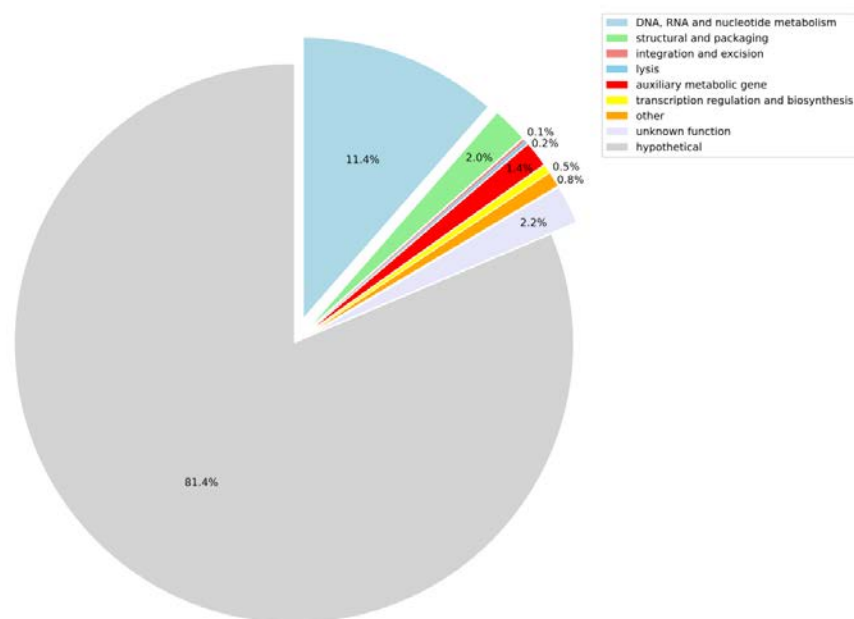

**Figure S3.** Relative number of functional categories after annotation. A total of 2,861 coding sequences were identified from the seven huge phage genomes.

**Figure S4: TblastX genome-wide comparisons**

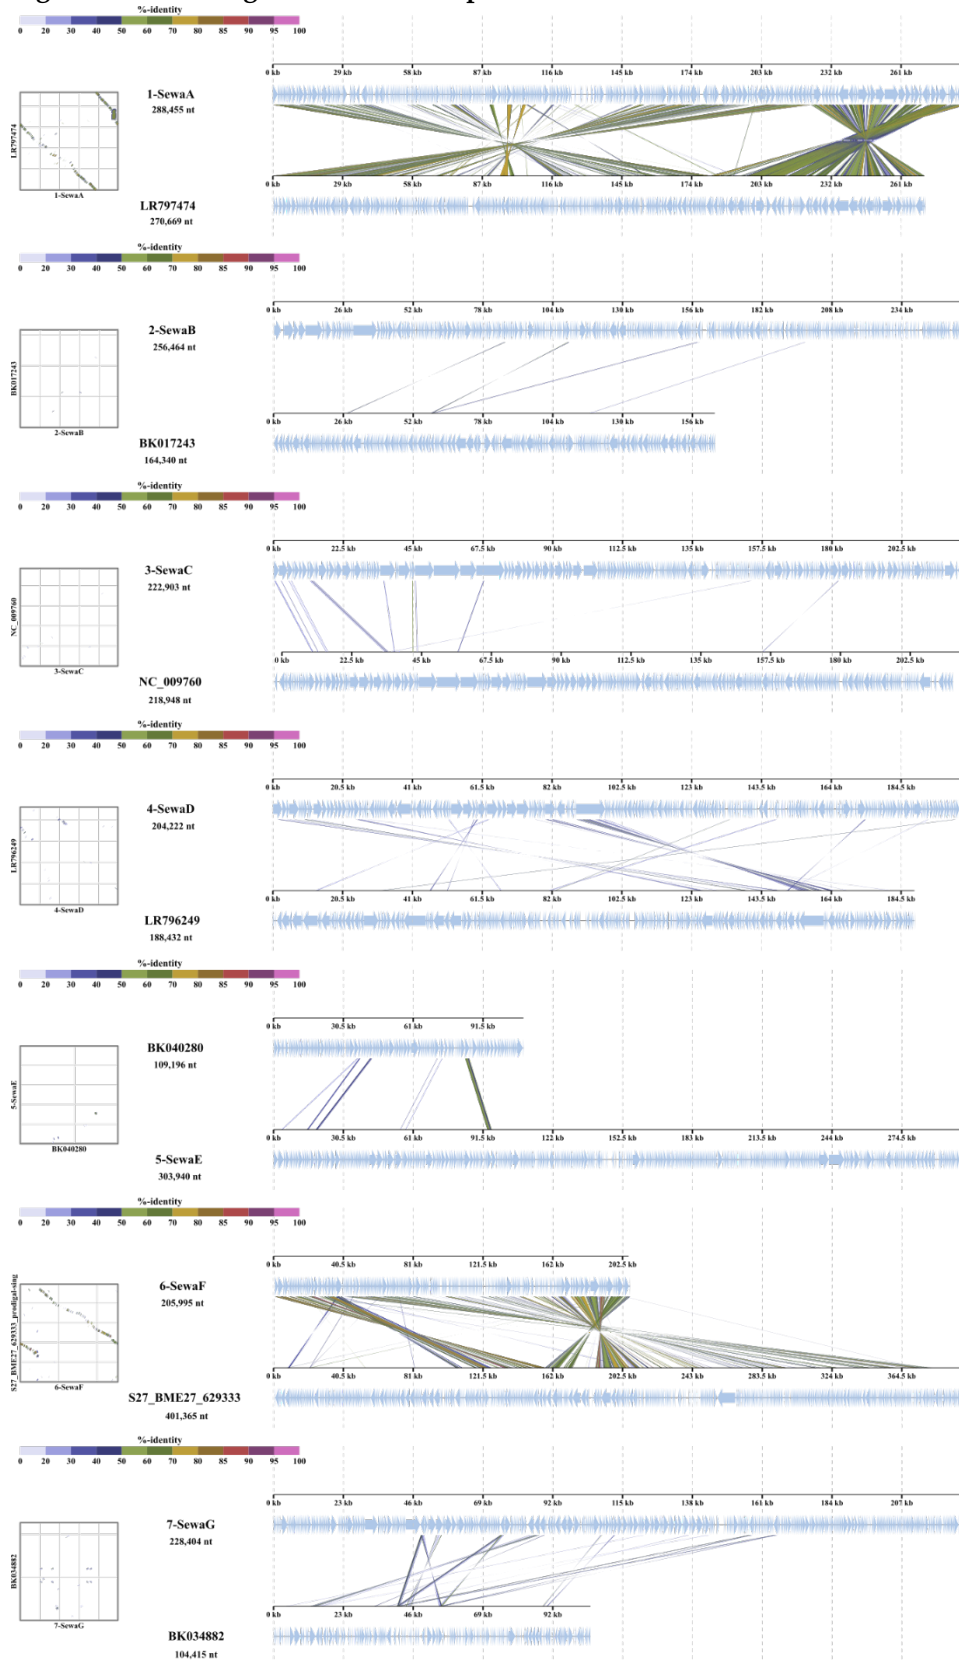

**Figure S4.** Genome tblastX comparisons between studied phage genomes and most related phage genomes. LR797474: uncultured Caudovirales phage genome assembly; BK017243: MAG TPA\_asm: Caudoviricetes sp. isolate ctmJK21; NC\_009760: Bacillus phage 0305phi8-36; LR796249: uncultured Caudovirales phage genome assembly; BK040280: MAG TPA\_asm: Bacteriophage sp. isolate ct8z11; S27\_BME27\_629333: BM\_PHAGE\_48\_13 – Mahaphage; BK034882: MAG TPA\_asm: Caudoviricetes sp. isolate ctDeJ4.

Figure S5: Proteomic subtree of studied phages genomes

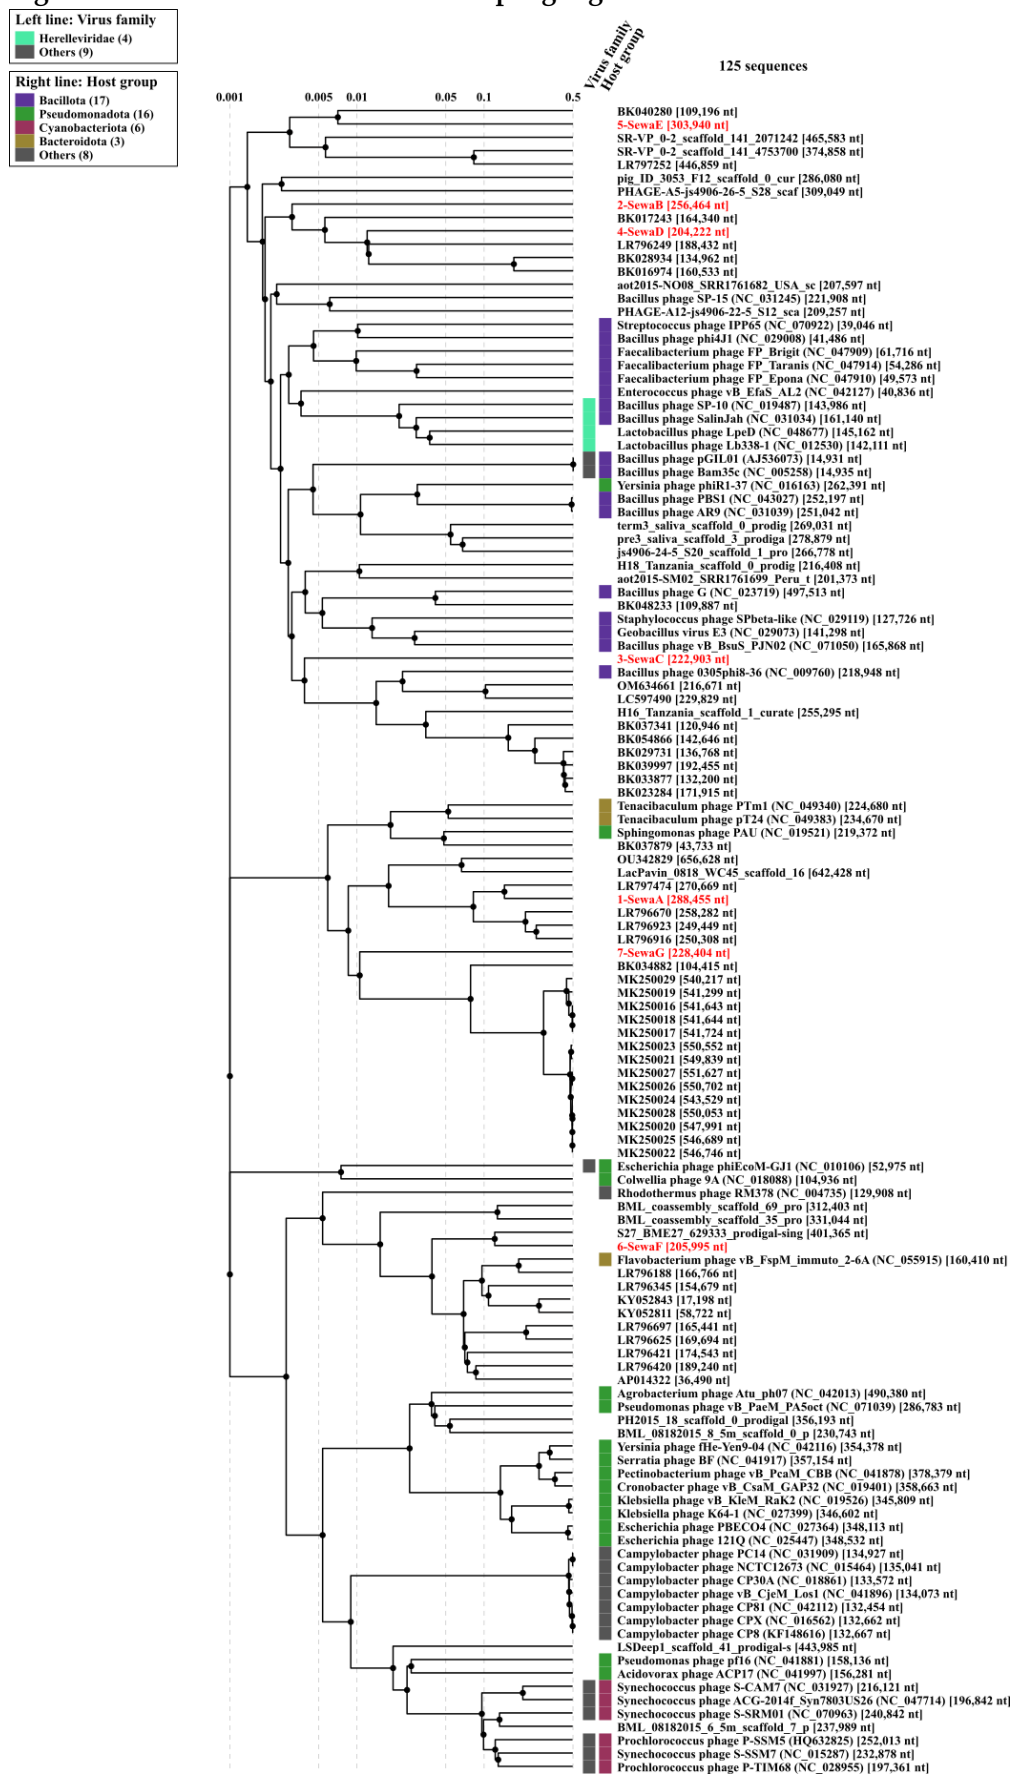

Figure S5. Tblastx-based proteomic subtree of studied phage genomes (shown in red) and their related phage genomes with taxonomic and host information where available. A subtree was selected for the relevant clades.

**Table S2. Overview of identified Auxiliary Metabolic Genes.**

| Contig /<br>Phage | AMG <sup>1</sup> Name                                       | KEGG Ortholog<br>number |
|-------------------|-------------------------------------------------------------|-------------------------|
| 1-SewaA           | vanY; zinc D-Ala-D-Ala carboxypeptidase                     | K07260                  |
|                   | purA, ADSS; adenylosuccinate synthase                       | K01939                  |
|                   | nudB, ntpA; dihydroneopterin triphosphate diphosphatase     | K08310                  |
|                   | waaC, rfaC; heptosyltransferase I                           | K02841                  |
|                   | pigG, redO; peptidyl carrier protein                        | K21781                  |
| 2-SewaB           | pncA; nicotinamidase/pyrazinamidase                         | K08281                  |
| 3-SewaC           | TSTA3, fcl; GDP-L-fucose synthase                           | K02377                  |
|                   | rfbA, rffH; glucose-1-phosphate thymidyltransferase         | K00973                  |
|                   | ahbD; heme synthase                                         | K22227                  |
|                   | rfbD, rmlD; dTDP-4-dehydrorhamnose reductase                | K00067                  |
|                   | rfbC, rmlC; dTDP-4-dehydrorhamnose 3,5-epimerase            | K01790                  |
|                   | rfbB, rffG; dTDP-glucose 4,6-dehydratase                    | K01710                  |
| 4-SewaD           | galE, GALE; UDP-glucose 4-epimerase                         | K01784                  |
|                   | phnP; phosphoribosyl 1,2-cyclic phosphate phosphodiesterase | K06167                  |
|                   | moeB; molybdopterin-synthase adenylyltransferase            | K21029                  |
|                   | pncA; nicotinamidase/pyrazinamidase                         | K08281                  |
|                   | rfbD, rmlD; dTDP-4-dehydrorhamnose reductase                | K00067                  |
|                   | wecB; UDP-N-acetylglucosamine 2-epimerase                   | K01791                  |
|                   | mec; [CysO sulfur-carrier protein]-S-L-cysteine hydrolase   | K21140                  |
|                   | pncB, NAPRT1; nicotinate phosphoribosyltransferase          | K00763                  |
|                   | rfbC, rmlC; dTDP-4-dehydrorhamnose 3,5-epimerase            | K01790                  |
| 5-SewaE           | iscS, NFS1; cysteine desulfurase                            | K04487                  |
|                   | pncB, NAPRT1; nicotinate phosphoribosyltransferase          | K00763                  |
|                   | DNMT3A; DNA (cytosine-5)-methyltransferase 3A               | K17398                  |
|                   | araD, ulaF, sgaE, sgbE; L-ribulose-5-phosphate 4-epimerase  | K03077                  |
|                   | cobT; cobaltochelatase CobT                                 | K09883                  |
|                   | coaD, kdtB; pantetheine-phosphate adenylyltransferase       | K00954                  |
|                   | cobS; cobaltochelatase CobS                                 | K09882                  |
|                   | pncA; nicotinamidase/pyrazinamidase                         | K08281                  |
|                   | nadD; nicotinate-nucleotide adenylyltransferase             | K00969                  |
|                   | phnP; phosphoribosyl 1,2-cyclic phosphate phosphodiesterase | K06167                  |
|                   | PPCDC, coaC; phosphopantothenoylcysteine decarboxylase      | K01598                  |
|                   | DNMT1, dcm; DNA (cytosine-5)-methyltransferase 1            | K00558                  |
|                   | nadE; NAD <sup>+</sup> synthase                             | K01916                  |
| 6-SewaF           | nadE; NAD <sup>+</sup> synthase                             | K01916                  |
|                   | pncA; nicotinamidase/pyrazinamidase                         | K08281                  |
|                   | DHFR, folA; dihydrofolate reductase                         | K00287                  |
|                   | pncB, NAPRT1; nicotinate phosphoribosyltransferase          | K00763                  |
| 7-SewaG           | NAMPT; nicotinamide phosphoribosyltransferase               | K03462                  |
|                   | queC; 7-cyano-7-deazaguanine synthase                       | K06920                  |
|                   | K13522, nadM; bifunctional NMN adenylyltransferase/nudix    | K13522                  |
|                   | hydrolase                                                   |                         |

<sup>1</sup> AMG: Auxiliary Metabolic Gene.

**Table S3. Number of transfer RNAs per tRNA type and phage genome**

|                   | 1-SewaA | 2-SewaB | 3-SewaC | 4-SewaD | 5-SewaE | 6-SewaF | 7-SewaG |
|-------------------|---------|---------|---------|---------|---------|---------|---------|
| <b>Amino acid</b> |         |         |         |         |         |         |         |
| standard          |         |         |         |         |         |         |         |
| Ala               | 1       | 0       | 0       | 1       | 1       | 2       | 1       |
| Arg               | 4       | 1       | 1       | 0       | 3       | 5       | 1       |
| Asn               | 1       | 0       | 0       | 1       | 2       | 1       | 1       |
| Asp               | 2       | 0       | 0       | 1       | 0       | 1       | 1       |
| Cys               | 2       | 1       | 0       | 1       | 1       | 1       | 1       |
| Gln               | 1       | 0       | 0       | 1       | 1       | 2       | 1       |
| Glu               | 2       | 0       | 0       | 1       | 2       | 1       | 0       |
| Gly               | 2       | 1       | 0       | 1       | 2       | 2       | 1       |
| His               | 1       | 1       | 0       | 1       | 0       | 1       | 0       |
| Ile               | 2       | 1       | 1       | 3       | 2       | 2       | 2       |
| Leu               | 5       | 1       | 1       | 2       | 3       | 4       | 3       |
| Lys               | 3       | 1       | 0       | 2       | 2       | 1       | 1       |
| fMet              | 2       | 0       | 0       | 0       | 0       | 0       | 0       |
| Met               | 2       | 0       | 0       | 1       | 1       | 3       | 0       |
| Phe               | 1       | 0       | 0       | 1       | 1       | 0       | 0       |
| Pro               | 4       | 1       | 1       | 1       | 2       | 3       | 0       |
| Ser               | 4       | 0       | 0       | 2       | 2       | 3       | 1       |
| Thr               | 3       | 1       | 0       | 0       | 1       | 3       | 1       |
| Trp               | 1       | 0       | 0       | 1       | 0       | 0       | 1       |
| Tyr               | 1       | 1       | 0       | 1       | 1       | 1       | 0       |
| Val               | 2       | 1       | 0       | 1       | 1       | 2       | 1       |
| non standard      |         |         |         |         |         |         |         |
| Pyl               | 0       | 0       | 0       | 0       | 0       | 0       | 0       |
| Sec               | 0       | 0       | 0       | 0       | 0       | 0       | 0       |
| Sup               | 1       | 1       | 1       | 0       | 0       | 0       | 0       |
| Total             | 47      | 12      | 5       | 23      | 28      | 38      | 17      |
| Pseudo Genes      | 2       | 2       | 1       | 2       | 2       | 1       | 3       |
